# Supplementary material for: Fenofibrate Facilitates Post-Active Tuberculosis Infection in Macrophages and is Associated with Higher Mortality in Patients under Long-Term Treatment
Source: PubMed Central journal article supplement (PMC7073736; doi:10.3390/jcm9020337), 2020-01-25
Supplement: jcm-09-00337-s001.pdf [file jcm-09-00337-s001.pdf]

**Supplementary Table S1.** Characteristics of the study cohorts.

| Variables                | Total<br>(N = 3025) |      | With Fenofibrate<br>(N = 605) |      | Without Fenofibrate<br>(N = 2420) |      | p Value * |
|--------------------------|---------------------|------|-------------------------------|------|-----------------------------------|------|-----------|
|                          | No.                 | %    | No.                           | %    | No.                               | %    |           |
| Gender                   |                     |      |                               |      |                                   |      | 0.999     |
| Male                     | 2145                | 70.9 | 429                           | 70.9 | 1716                              | 70.9 |           |
| Female                   | 880                 | 29.1 | 176                           | 29.1 | 704                               | 29.1 |           |
| Age (mean ± SD, years)   | 61.5 ± 16.7         |      | 61.3 ± 17.5                   |      | 61.6 ± 17.7                       |      | 0.740     |
| Anti-TB medications **   | 2188                | 72.3 | 416                           | 68.8 | 1772                              | 73.2 | 0.017     |
| Comorbidities            |                     |      |                               |      |                                   |      |           |
| Congestive heart failure | 139                 | 4.6  | 24                            | 4.0  | 115                               | 4.8  | 0.240     |
| Hypertension             | 338                 | 11.2 | 79                            | 13.1 | 259                               | 10.7 | 0.080     |
| Diabetes                 | 555                 | 18.4 | 108                           | 17.9 | 447                               | 18.5 | 0.387     |
| COPD                     | 220                 | 7.3  | 36                            | 6.0  | 184                               | 7.6  | 0.093     |
| Emphysema                | 14                  | 0.5  | 3                             | 0.5  | 11                                | 0.5  | 0.552     |
| Pneumoconiosis           | 27                  | 0.9  | 2                             | 0.3  | 25                                | 1.0  | 0.071     |
| Chronic kidney disease   | 124                 | 4.1  | 23                            | 3.8  | 101                               | 4.2  | 0.390     |
| Level of care            |                     |      |                               |      |                                   |      | 0.003     |
| Medical center           | 1159                | 38.3 | 256                           | 42.3 | 903                               | 37.3 |           |
| Regional hospital        | 1132                | 37.4 | 233                           | 38.5 | 899                               | 37.2 |           |
| Local hospital           | 734                 | 24.3 | 116                           | 19.2 | 68                                | 25.5 |           |
| Income (NTD)             |                     |      |                               |      |                                   |      | 0.744     |
| <18,000                  | 2,988               | 98.8 | 597                           | 98.7 | 2,391                             | 98.8 |           |
| 18,000–34,999            | 29                  | 1.0  | 7                             | 1.2  | 22                                | 0.9  |           |
| ≥35,000                  | 8                   | 0.3  | 1                             | 0.2  | 7                                 | 0.3  |           |

\* Comparisons between the two groups were performed using the Chi-square/Fisher exact test (for categorical variable) and Student *t*-test (for continuous variables). \*\* Anti-tuberculosis (anti-TB) medications represent any treatment regimen, including treatment with isoniazid and rifampin.

**Supplementary Table S2.** Cause of death.

| Cause                                         | With Fenofibrate<br>(N = 108) |      | Without Fenofibrate<br>(N = 354) |      | p Value * |
|-----------------------------------------------|-------------------------------|------|----------------------------------|------|-----------|
|                                               | No.                           | %    | No.                              | %    |           |
|                                               |                               |      |                                  |      | 0.472     |
| Infections, sepsis                            | 41                            | 38.0 | 131                              | 37.0 |           |
| Tuberculosis                                  | 8                             | 7.4  | 19                               | 5.4  |           |
| Pneumonia                                     | 16                            | 14.8 | 59                               | 16.7 |           |
| Other infections or unknown pathogens         | 17                            | 15.7 | 53                               | 15.0 |           |
| Respiratory cause                             | 25                            | 23.1 | 101                              | 28.5 |           |
| Cancer                                        | 14                            | 13.0 | 55                               | 15.5 |           |
| Circulatory cause                             | 11                            | 10.2 | 32                               | 9.0  |           |
| Gastrointestinal, hepatitis, or biliary cause | 10                            | 9.3  | 21                               | 5.9  |           |
| Brain injury                                  | 5                             | 4.6  | 5                                | 1.4  |           |
| Renal/urologic cause                          | 2                             | 1.9  | 5                                | 1.4  |           |
| Others                                        | 0                             | 0.0  | 4 **                             | 1.1  |           |

\* Comparisons between the two groups were performed using an unpaired *t*-test. \*\* One burn, one poisoning, one intragenic complication, and one unknown cause.

**Supplementary Table S3.** Kaplan-Meier curve table for cumulative risk of mortality between the study and comparison cohorts using the log-rank test.

| In the Tracking of X Year (s) | With Fenofibrate<br>(N = 605) | Without Fenofibrate<br>(N = 2420) | p Value |
|-------------------------------|-------------------------------|-----------------------------------|---------|
|                               | Number of mortalities         |                                   |         |
| 1                             | 42                            | 105                               | 0.364   |
| 2                             | 51                            | 143                               | 0.254   |
| 3                             | 58                            | 178                               | 0.121   |
| 4                             | 66                            | 205                               | 0.286   |
| 5                             | 71                            | 230                               | 0.304   |
| 6                             | 75                            | 254                               | 0.498   |

|    |     |     |       |
|----|-----|-----|-------|
| 7  | 81  | 281 | 0.111 |
| 8  | 94  | 317 | 0.078 |
| 9  | 98  | 329 | 0.044 |
| 10 | 107 | 342 | 0.042 |
| 11 | 108 | 354 | 0.035 |

---
